# Supplementary material for: O-GlcNAc Transferase Regulates Angiogenesis in Idiopathic Pulmonary Arterial Hypertension
Source: MDPI journal article supplement (doi:10.3390/ijms20246299), 2019-12-13
Supplement: s1 [file s1]

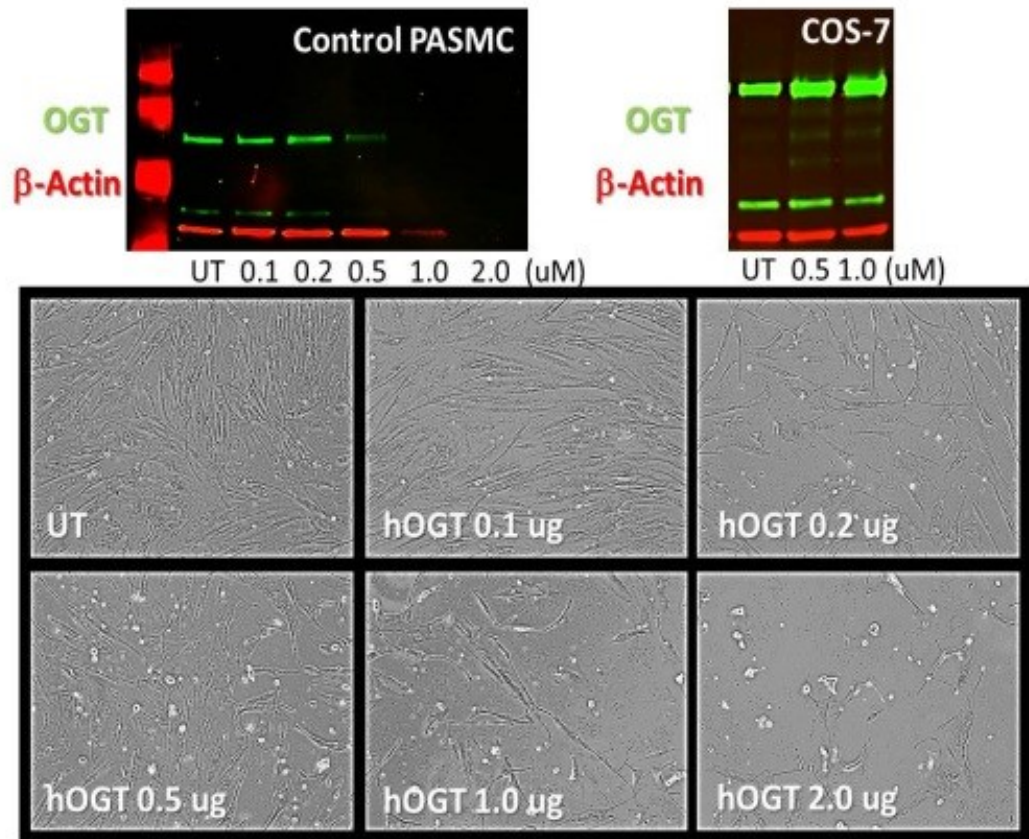

**Supplemental figure 1: Dose-dependent cell death in control PSMCs that is not observed in COS-7 cells.** PSMCs and COS-7 cells were transfected with different doses of hOGT plasmid. The dose response shown in the control PSMCs shows that the OGT levels do not change at 0.1 and 0.2 compared to the UT. When we increased the amount of plasmid transfected (from 0.5 to 2.0), we observed a dose-dependent cell death response (cell images). The lack of protein loaded reflects the loss of cells due to the overexpression of OGT. All cells were collected at 48 hours for this experiment. Similar findings were observed at a 24hr collection period (data not shown). UT = untransfected, hOGT = human OGT plasmid.
